# Supplementary material for: Long-Term Cause-Specific Mortality in Hodgkin Lymphoma Patients
Source: PubMed Central journal article supplement — J Natl Cancer Inst. 2020 Dec 22;113(6):760–9. doi: 10.1093/jnci/djaa194 (PMC8168246; doi:10.1093/jnci/djaa194), 2020-12-22
Supplement: djaa194_supplementary_data.pdf [file djaa194_supplementary_data.pdf]

## Supplementary Methods

The following periods were used in our current study as well as in previous studies on our cohort: 1965-1976, 1977-1988, 1989-2000 (Van Eggermond, et al. 2014; Schaapveld, et al. 2015; De Vries, et al. 2018). These periods were indeed primarily based on changes in HL treatment. Most patients were treated in trials or per treatment policies developed by the European Organisation for Research and Treatment of Cancer Lymphoma Group (Carde, et al. 1988; Eghbali, et al. 2005; Raemaekers, et al. 2002; Maraldo, et al. 2015). In the period 1965-1976 primary treatment for early stage patients consisted of mantle field or extended-field radiotherapy with or without vinblastine/procarbazine. Patients usually received 40 Gray (Gy) in fractions of 1.5–2.0 Gy. Radiotherapy was delivered with orthovoltage X-rays in the 1960s and early 1970s. Most patients were treated with megavoltage X-rays as of the late 1970s leading to better coverage of the target volume (Kaplan, 1981). Treatment for advanced stage patients varied substantially and could consist of extensive radiotherapy or of combination chemotherapy with or without radiotherapy. Especially in the 1960s cure rates were still relatively low. In the period 1977-1988, primary chemotherapy for early stage patients no longer consisted of single agents but of combination chemotherapy, usually consisting of mechlorethamine, vincristine, procarbazine and prednisone (MOPP) or MOPP-like regimens. Chemotherapy was combined with intensive radiotherapy regimens still including relatively high radiation doses (30-40 Gy in fractions of 2 Gy) and extensive radiation fields. Consequently, a significant proportion of patients still received both supra- and infradiaphragmatic fields. In the late 1980s anthracycline-containing regimens were introduced in primary setting. These regimens were shown to be more effective and less (gonado)toxic than MOPP-like regimens. Treatment adaptations led to significantly improved cure rates, but also to long-term side effects. The awareness of treatment-associated toxicity led to development of more individualized treatment with, for most patients, less intensive chemo- and radiotherapy regimens. These less intensive regimens were developed in the period 1989-2000. Splenectomy was no longer used as part of the staging procedure. Furthermore, patients were treated with lower doses of procarbazine and received involved-field rather than extended-field radiotherapy.

**Supplementary Table 1.** Hodgkin lymphoma treatment by treatment period (primary treatment and treatment for relapse combined)

| Treatment period                 | 1965–1976<br>(n=1121) | 1977–1988<br>(n=1588) | 1989–2000<br>(n=2210) |
|----------------------------------|-----------------------|-----------------------|-----------------------|
|                                  | n (%)                 | n (%)                 | n (%)                 |
| <b>HL treatment</b>              |                       |                       |                       |
| Radiotherapy alone               | 320 (28.6)            | 422 (26.6)            | 433 (19.6)            |
| Chemotherapy alone               | 103 (9.2)             | 189 (11.9)            | 396 (17.9)            |
| Radiotherapy and chemotherapy    | 698 (62.3)            | 977 (61.5)            | 1381 (62.5)           |
| <b>Radiotherapy field</b>        |                       |                       |                       |
| No radiotherapy                  | 103 (9.2)             | 189 (11.9)            | 396 (17.9)            |
| Supradiaphragmatic RT            | 400 (35.7)            | 590 (37.2)            | 1016 (46.0)           |
| Infradiaphragmatic RT            | 47 (4.2)              | 118 (7.4)             | 89 (4.0)              |
| Supra- and infradiaphragmatic RT | 517 (46.1)            | 634 (39.9)            | 549 (24.8)            |
| RT field unknown                 | 54 (4.8)              | 57 (3.6)              | 160 (7.2)             |
| <b>Spleen irradiation</b>        |                       |                       |                       |
| No                               | 908 (81.0)            | 1125 (70.8)           | 1529 (69.2)           |
| Yes                              | 159 (14.2)            | 406 (25.6)            | 521 (23.6)            |
| RT field unknown                 | 54 (4.8)              | 57 (3.6)              | 160 (7.2)             |
| <b>Anthracyclines</b>            |                       |                       |                       |
| No                               | 972 (86.7)            | 1097 (69.1)           | 546 (24.7)            |
| Yes                              | 85 (7.6)              | 445 (28.0)            | 1554 (70.3)           |
| CT regimen unknown               | 64 (5.7)              | 47 (2.9)              | 111 (5.0)             |
| <b>Procarbazine</b>              |                       |                       |                       |
| No                               | 514 (45.9)            | 547 (34.5)            | 811 (36.7)            |
| Yes                              | 543 (48.4)            | 995 (62.7)            | 1289 (58.3)           |
| CT regimen unknown               | 64 (5.7)              | 46 (2.9)              | 111 (5.0)             |
| <b>Splenectomy</b>               |                       |                       |                       |
| No                               | 617 (55.0)            | 1007 (63.4)           | 2106 (95.3)           |
| Yes                              | 450 (40.1)            | 485 (30.5)            | 53 (2.4)              |
| Unknown                          | 54 (4.8)              | 96 (6.1)              | 51 (2.3)              |

**Supplementary Table 2.** Mortality from causes of death other than Hodgkin lymphoma, solid tumors, and cardiovascular disease by sex, age, treatment, and attained age

|                                     | Causes of death other than HL<br>(n=1474) |       |                |       | Solid tumors<br>(n=568) |      |                  |       | Cardiovascular disease*<br>(n=363) |      |                  |       |
|-------------------------------------|-------------------------------------------|-------|----------------|-------|-------------------------|------|------------------|-------|------------------------------------|------|------------------|-------|
|                                     | O                                         | E     | SMR (95%CI)    | AEM   | O                       | E    | SMR (95%CI)      | AEM   | O                                  | E    | SMR (95%CI)      | AEM   |
| <b>Sex</b>                          |                                           |       |                |       |                         |      |                  |       |                                    |      |                  |       |
| Male                                | 903                                       | 188.9 | 4.8 (4.5-5.1)  | 133.7 | 323                     | 61.7 | 5.2 (4.7-5.8)    | 48.9  | 231                                | 43.7 | 5.3 (4.6-6.0)    | 35.1  |
| Female                              | 571                                       | 102.5 | 5.6 (5.1-6.0)  | 109.5 | 245                     | 50.0 | 4.9 (4.3-5.6)    | 45.6  | 132                                | 14.3 | 9.2 (7.7-11.0)   | 27.5  |
| <i>P</i> <sub>heterogeneity</sub>   |                                           |       | 0.004          | 0.002 |                         |      | 0.437            | 0.499 |                                    |      | 0.000            | 0.054 |
| <b>Age at HL treatment, years</b>   |                                           |       |                |       |                         |      |                  |       |                                    |      |                  |       |
| <25                                 | 420                                       | 51.2  | 8.2 (7.4-9.0)  | 88.0  | 165                     | 17.4 | 9.5 (8.1-11.1)   | 35.2  | 102                                | 6.9  | 14.7 (12.0-17.9) | 22.7  |
| 25–34                               | 473                                       | 83.4  | 5.7 (5.2-6.2)  | 123.9 | 197                     | 33.2 | 5.9 (5.1-6.8)    | 52.1  | 107                                | 15.0 | 7.1 (5.8-8.6)    | 29.2  |
| 35–50                               | 581                                       | 156.7 | 3.7 (3.4-4.0)  | 185.8 | 206                     | 61.1 | 3.4 (2.9-3.8)    | 63.4  | 154                                | 36.1 | 4.3 (3.6-5.0)    | 51.6  |
| <i>P</i> <sub>heterogeneity</sub>   |                                           |       | 0.000          | 0.000 |                         |      | 0.000            | 0.000 |                                    |      | 0.000            | 0.000 |
| <i>P</i> <sub>trend</sub>           |                                           |       | 0.000          | 0.000 |                         |      | 0.000            | 0.000 |                                    |      | 0.000            | 0.000 |
| <b>HL treatment</b>                 |                                           |       |                |       |                         |      |                  |       |                                    |      |                  |       |
| Radiotherapy alone                  | 471                                       | 96.3  | 4.9 (4.5-5.4)  | 132.1 | 186                     | 37.7 | 4.9 (4.2-5.7)    | 52.3  | 147                                | 19.5 | 7.5 (6.4-8.9)    | 45.0  |
| Chemotherapy alone                  | 108                                       | 41.7  | 2.6 (2.1-3.1)  | 57.7  | 38                      | 15.3 | 2.5 (1.8-3.4)    | 19.7  | 14                                 | 8.8  | 1.6 (0.9-2.7)    | 4.5   |
| Radiotherapy and chemotherapy       | 895                                       | 153.4 | 5.8 (5.5-6.2)  | 131.6 | 344                     | 58.6 | 5.9 (5.3-6.5)    | 50.6  | 202                                | 29.7 | 6.8 (5.9-7.8)    | 30.6  |
| <i>P</i> <sub>heterogeneity</sub>   |                                           |       | 0.000          | 0.000 |                         |      | 0.000            | 0.000 |                                    |      | 0.000            | 0.000 |
| <b>Attained age, years</b>          |                                           |       |                |       |                         |      |                  |       |                                    |      |                  |       |
| <i>&lt;25 years at HL treatment</i> |                                           |       |                |       |                         |      |                  |       |                                    |      |                  |       |
| <30                                 | 50                                        | 8.6   | 5.8 (4.3-7.7)  | 24.8  | 5                       | 0.8  | 6.4 (2.1-15.0)   | 2.5   | 5                                  | 0.4  | 12.0 (3.9-28.1)  | 2.7   |
| 30–49                               | 215                                       | 22.8  | 9.4 (8.2-10.8) | 89.9  | 96                      | 6.9  | 13.9 (11.3-17.0) | 41.6  | 52                                 | 3.4  | 15.5 (11.6-20.3) | 22.7  |
| ≥50                                 | 155                                       | 19.8  | 7.8 (6.6-9.2)  | 351.9 | 64                      | 9.7  | 6.6 (5.1-8.4)    | 141.4 | 45                                 | 3.1  | 14.3 (10.4-19.1) | 108.9 |
| <i>P</i> <sub>heterogeneity</sub>   |                                           |       | 0.004          | 0.000 |                         |      | 0.000            | 0.000 |                                    |      | 0.819            | 0.000 |
| <i>P</i> <sub>trend</sub>           |                                           |       | 0.382          | 0.000 |                         |      | 0.001            | 0.000 |                                    |      | 0.958            | 0.000 |
| <i>25–34 years at HL treatment</i>  |                                           |       |                |       |                         |      |                  |       |                                    |      |                  |       |
| <50                                 | 193                                       | 30.4  | 6.4 (5.5-7.3)  | 69.2  | 62                      | 9.1  | 6.8 (5.2-8.7)    | 22.5  | 40                                 | 5.1  | 7.8 (5.6-10.7)   | 14.8  |
| 50–59                               | 143                                       | 25.3  | 5.7 (4.8-6.7)  | 208.5 | 70                      | 11.4 | 6.1 (4.8-7.7)    | 103.8 | 34                                 | 4.8  | 7.1 (5.0-10.0)   | 51.8  |
| ≥60                                 | 137                                       | 27.8  | 4.9 (4.1-5.8)  | 476.4 | 65                      | 12.7 | 5.1 (3.9-6.5)    | 228.3 | 33                                 | 5.2  | 6.4 (4.4-9.0)    | 121.4 |
| <i>P</i> <sub>heterogeneity</sub>   |                                           |       | 0.076          | 0.000 |                         |      | 0.266            | 0.000 |                                    |      | 0.684            | 0.000 |
| <i>P</i> <sub>trend</sub>           |                                           |       | 0.023          | 0.000 |                         |      | 0.108            | 0.000 |                                    |      | 0.384            | 0.000 |
| <i>35–50 years at HL treatment</i>  |                                           |       |                |       |                         |      |                  |       |                                    |      |                  |       |
| <50                                 | 84                                        | 18.9  | 4.5 (3.6-5.5)  | 75.9  | 21                      | 6.1  | 3.5 (2.1-5.3)    | 17.4  | 15                                 | 4.3  | 3.5 (1.9-5.7)    | 12.4  |

|                     |     |      |               |       |     |      |               |       |     |      |               |       |
|---------------------|-----|------|---------------|-------|-----|------|---------------|-------|-----|------|---------------|-------|
| 50–59               | 207 | 46.3 | 4.5 (3.9-5.1) | 185.1 | 80  | 19.5 | 4.1 (3.3-5.1) | 69.7  | 39  | 10.9 | 3.6 (2.5-4.9) | 32.3  |
| ≥60                 | 290 | 91.6 | 3.2 (2.8-3.6) | 356.3 | 105 | 35.4 | 3.0 (2.4-3.6) | 124.7 | 100 | 20.8 | 4.8 (3.9-5.8) | 142.1 |
| $P_{heterogeneity}$ |     |      | 0.000         | 0.000 |     |      | 0.090         | 0.000 |     |      | 0.190         | 0.000 |
| $P_{trend}$         |     |      | 0.000         | 0.000 |     |      | 0.117         | 0.000 |     |      | 0.086         | 0.000 |

\* Excluding deaths from cerebrovascular disease

O=observed; E=expected; SMR=standardized mortality ratio; 95%CI=95% confidence interval; AEM=absolute excess mortality per 10,000 person-years

**Supplementary Table 3.** Multivariable Cox regression analyses of potential risk factors for respiratory and digestive disease mortality

|                                   | Respiratory disease*<br>(n=38) |                   | Digestive disease†<br>(n=32) |                  |
|-----------------------------------|--------------------------------|-------------------|------------------------------|------------------|
|                                   | n                              | HR (95%CI)        | n                            | HR (95%CI)       |
| <b>Sex</b>                        |                                |                   |                              |                  |
| Male                              | 24                             | 1.00 (Ref.)       | 21                           | 1.00 (Ref.)      |
| Female                            | 14                             | 0.64 (0.33-1.24)  | 11                           | 0.64 (0.31-1.34) |
| <b>Age at HL treatment</b>        |                                |                   |                              |                  |
| <25 years                         | 11                             | 1.00 (Ref.)       | 10                           | 1.00 (Ref.)      |
| 25–34 years                       | 12                             | 1.09 (0.41-2.87)  | 8                            | 0.42 (0.16-1.08) |
| 35–50 years                       | 15                             | 0.81 (0.28-2.33)  | 14                           | 0.48 (0.20-1.18) |
| <b>Supradiaphragmatic RT</b>      |                                |                   |                              |                  |
| No RT or no supradiaphragmatic RT | 2                              | 1.00 (Ref.)       |                              |                  |
| Yes                               | 36                             | 7.91 (1.85-33.88) |                              |                  |
| <b>Infradiaphragmatic RT</b>      |                                |                   |                              |                  |
| No RT of no infradiaphragmatic RT |                                |                   | 11                           | 1.00 (Ref.)      |
| Yes                               |                                |                   | 20                           | 2.41 (1.15-5.06) |
| <b>Chemotherapy</b>               |                                |                   |                              |                  |
| <i>Bleomycin</i>                  |                                |                   |                              |                  |
| No                                | 26                             | 1.00 (Ref.)       |                              |                  |
| Yes                               | 9                              | 0.77 (0.34-1.73)  |                              |                  |
| <i>Procarbazine</i>               |                                |                   |                              |                  |
| No                                | 13                             | 1.00 (Ref.)       | 13                           | 1.00 (Ref.)      |
| Yes                               | 22                             | 2.27 (1.10-4.66)  | 19                           | 1.54 (0.75-3.14) |

\* Excluding deaths from pneumonia and influenza

† Non-cancer digestive disease

HL=Hodgkin lymphoma; HR=hazard ratio; 95%CI=95% confidence interval; RT=radiotherapy; CT=chemotherapy

For variables with missing values, the number of cases in each category do not add up to the total number of cases. Missing values for each variable were assigned to a 'missing' category and analyzed as such in the model. Hazard ratios for this category showed no statistical significance and are not presented in this table.

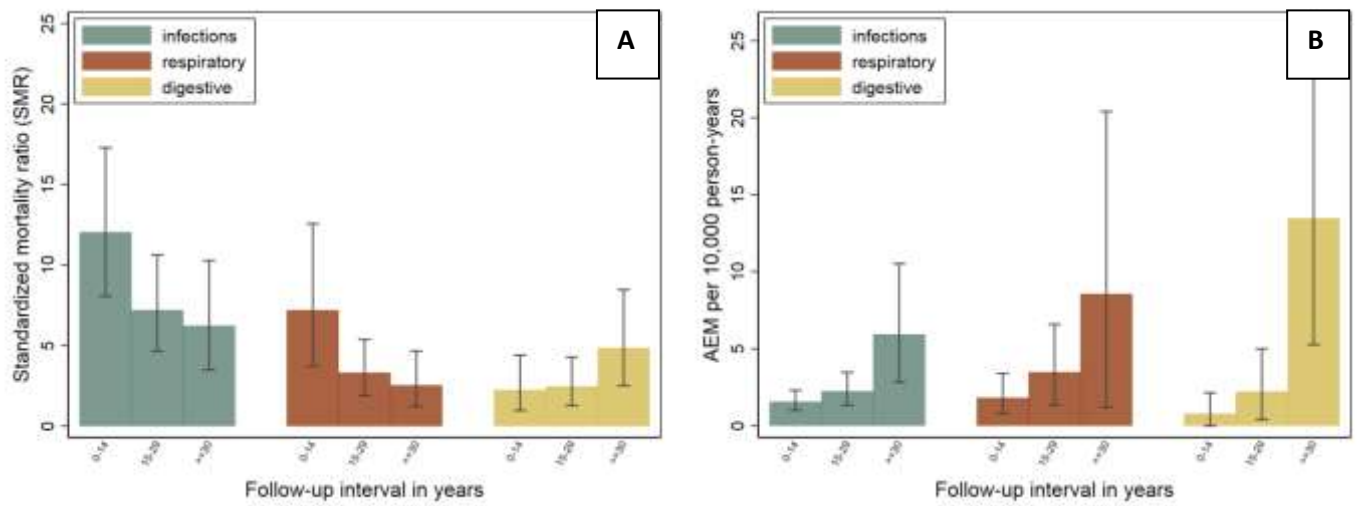

**Supplementary Figure 1.** Standardized mortality ratios (A) and absolute excess mortality (B) from infectious diseases, respiratory diseases, and digestive diseases by follow-up interval.

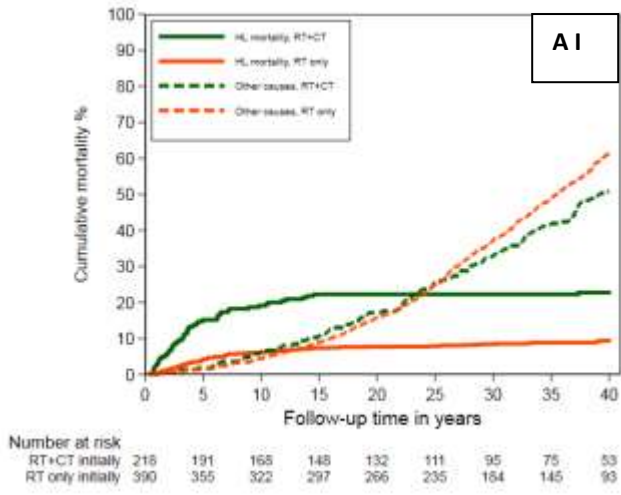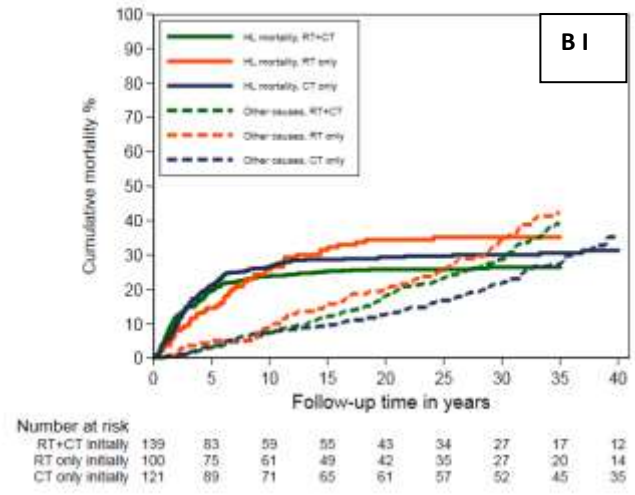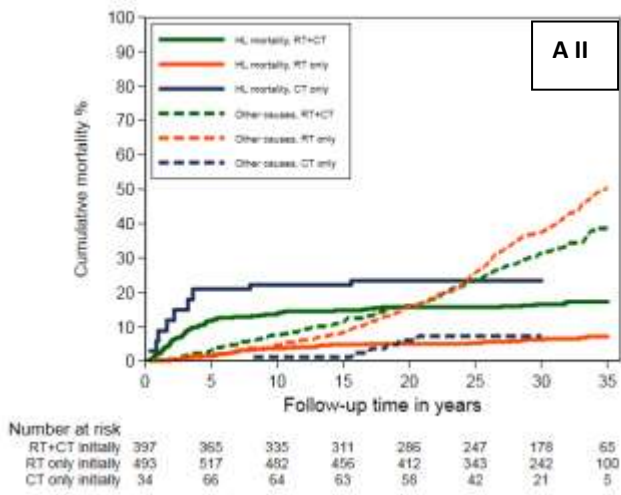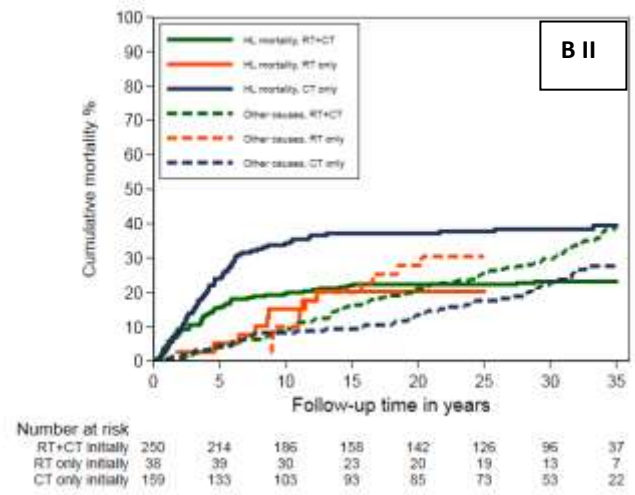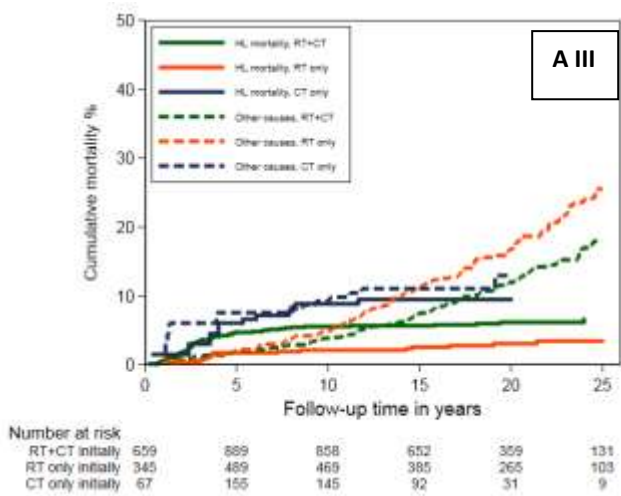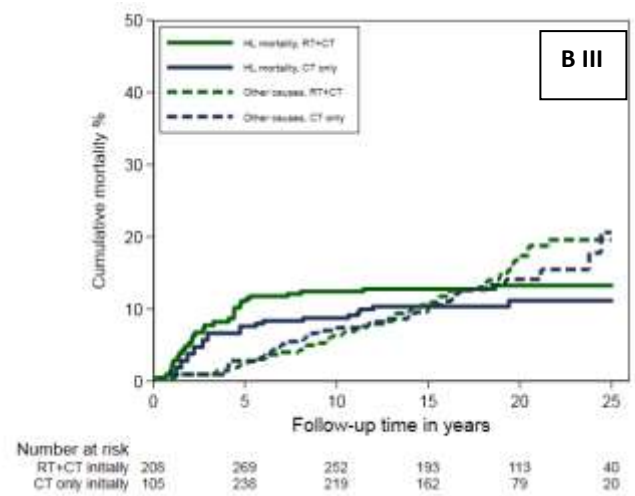

**Supplementary Figure 2.** Cumulative mortality from Hodgkin lymphoma and causes other than Hodgkin lymphoma by stage and initial treatment for patients treated between 1965-1976 (I), 1977-1988 (II), and 1989-2000 (III). The left panels (A) show the cumulative mortality in patients with stage I-II disease, the right panels (B) show the cumulative mortality in patients with stage III-IV disease.

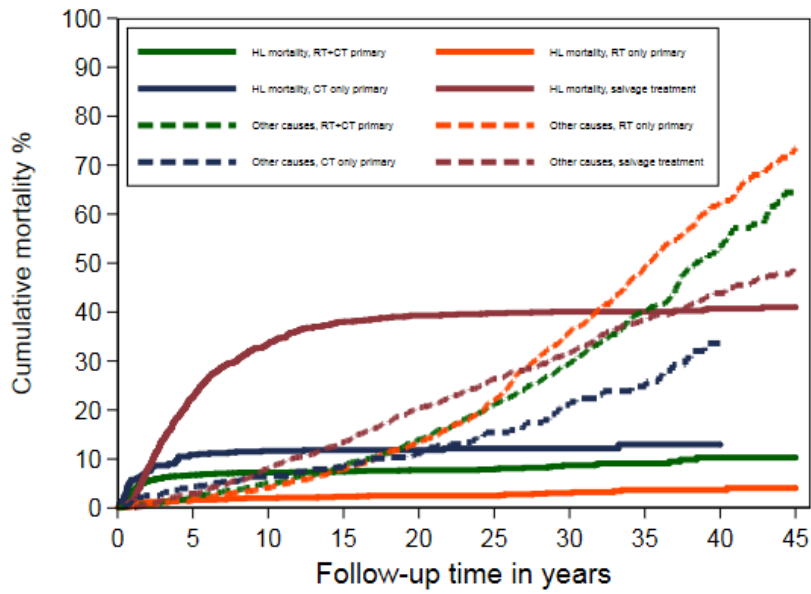

| Number at risk  |      |      |      |      |     |     |     |     |    |    |
|-----------------|------|------|------|------|-----|-----|-----|-----|----|----|
| RT+CT primary   | 1466 | 1750 | 1675 | 1379 | 979 | 624 | 354 | 171 | 70 | 22 |
| RT only primary | 909  | 1080 | 1035 | 938  | 787 | 577 | 359 | 201 | 86 | 35 |
| CT only primary | 279  | 547  | 522  | 410  | 266 | 165 | 100 | 61  | 30 | 4  |
| Salvage         | 1240 | 976  | 753  | 610  | 464 | 338 | 235 | 141 | 70 | 28 |

**Supplementary Figure 3.** Cumulative mortality from Hodgkin lymphoma and causes other than Hodgkin lymphoma by total treatment received.
